# Supplementary material for: Discovering Immune-Mediated Mechanisms of Gastric Carcinogenesis Through Single-Cell RNA Sequencing
Source: PubMed Central journal article supplement (PMC9231461; doi:10.3389/fimmu.2022.902017), 2022-06-10
Supplement: Table_1.pdf [file Table_1.pdf]

| Analysis Type                    | Program                                                                                                                                                                                                                                                                                                                           | Datasets                                                                                                                                                                           |
|----------------------------------|-----------------------------------------------------------------------------------------------------------------------------------------------------------------------------------------------------------------------------------------------------------------------------------------------------------------------------------|------------------------------------------------------------------------------------------------------------------------------------------------------------------------------------|
| <b>Cell Identity</b>             | <a href="#">SingleR (Aran D, et al. 2019)</a><br><a href="#">dynamicTreeCut (Langerfelder P, et al. 2008)</a><br><a href="#">schHCL (Han X, et al. 2020)</a><br><a href="#">CIBERSORT (bulk RNA seq) (Newman AM, et al. 2015)</a>                                                                                                 | <a href="#">HCL (Han X, et al. 2020)</a>                                                                                                                                           |
| <b>Gene Ontology</b>             | <a href="#">EnrichR (Chen EY, et al. 2013, Kuleshov MV, et al. 2016)</a><br><a href="#">Metascape (Zhou Y, et al. 2019)</a><br><a href="#">clusterProfiler (Yu G, et al. 2012)</a><br><a href="#">GSVA (Hänzelmann S, et al. 2013)</a><br><a href="#">WebGestalt (Wang J, et al. 2017)</a>                                        | <a href="#">MSigDB (Subramanian A, et al. 2005)</a><br>Hallmark (Liberzon A, et al. 2015)<br>REACTOME (Croft D, et al. 2014)<br>KEGG<br><a href="#">HAdb (Tong T, et al. 2021)</a> |
| <b>Cell State</b>                | <a href="#">SCENIC (Aibar S, et al. 2017)</a><br><a href="#">CellCycleScoring (Butler A, et al. 2018)</a>                                                                                                                                                                                                                         |                                                                                                                                                                                    |
| <b>Intercellular Interaction</b> | <a href="#">FANTOM5 (Ramilowski JA, et al. 2015)</a><br><a href="#">STRING (Szklarczyk D, et al. 2019)</a><br><a href="#">CellPhoneDB (Vento-Tormo R, et al. 2018, Elfremova M, et al. 2020)</a><br><a href="#">CellChat (Jin S, et al. 2021)</a>                                                                                 |                                                                                                                                                                                    |
| <b>Trajectory</b>                | <a href="#">Monocle2/3 (Trapnell C, et al. 2014)</a><br><a href="#">Slingshot (Street K, et al. 2018)</a><br><a href="#">SCORPIUS (Cannoodt R, et al. 2016)</a><br><a href="#">MarkovHC (Wang Z, et al. 2022)</a><br><a href="#">RNA velocity (La Manno, et al. 2018)</a>                                                         |                                                                                                                                                                                    |
| <b>Chromosomal Variation</b>     | <a href="#">inferCNV (Patel AP, et al. 2014, Wang R, et al. 2021)</a><br><a href="#">LIAYSON (Andor N, et al. 2020)</a><br><a href="#">VarTrix (Kim J, et al. 2022)</a><br><a href="#">GISTIC2 (Mermel CH, et al. 2011)</a><br><a href="#">Mutect2 (Cibulskis K, et al. 2013)</a><br><a href="#">CopyKAT (Gao R, et al. 2021)</a> |                                                                                                                                                                                    |
| <b>Survival</b>                  | <a href="#">survminer (Zhang P, et al. 2019)</a><br><a href="#">KaplanMeier Plotter (Györfy B, et al. 2010)</a>                                                                                                                                                                                                                   |                                                                                                                                                                                    |
| <b>Cancer Gene Expression</b>    | CIPHER (Wu X, et al. 2008)<br><a href="#">CancerSEA (Yuan H, et al. 2019)</a><br><a href="#">GEPIA2 (Tang Z, et al. 2019)</a><br><a href="#">UCSC Xena (Goldman M et al. 2020)</a>                                                                                                                                                | <a href="#">TCGA STAD (Liu J, et al. 2018)</a><br><a href="#">Firebrowse (Deng M, et al. 2017)</a><br>PanCanAtlas                                                                  |
